# Supplementary material
Source: Springer Nature journal article supplement (https://www.springermedizin.de/resource/supplementary/13032_2014_85_MOESM4_ESM.pdf/9651592)

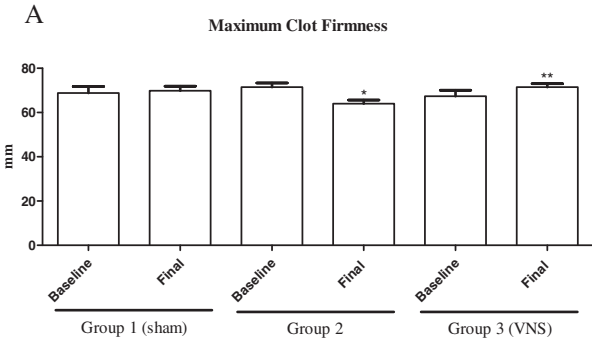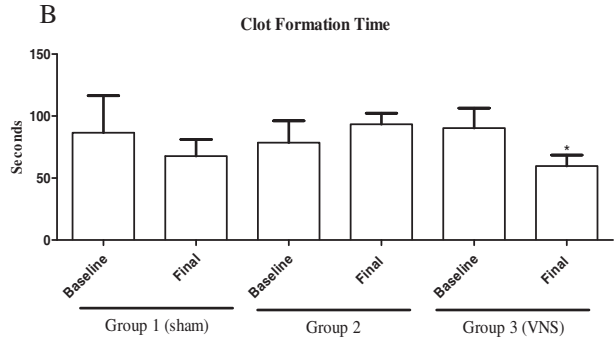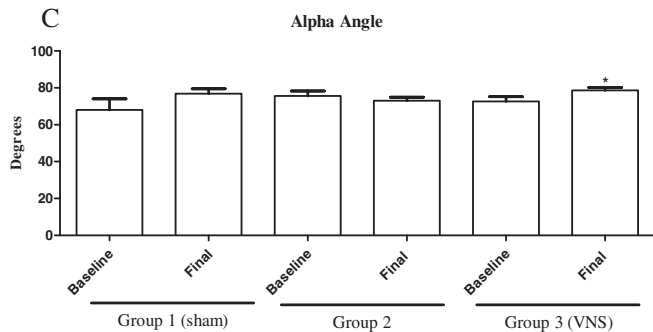

Supplement: MOESM4 [file 9651592]
